# Supplementary material
Source: Copernicus journal article supplement (doi:10.5194/egusphere-2026-3750)
Supplement: Supplementary file 1 [file egusphere-2026-3750-supplement.pdf]

1 Supplement of

2 **Comparative Nitrogen Speciation in Marine and Coastal Urban Aerosols of**  
3 **the Greater Bay Area and Ecosystem Implications**

4 Cong Cao<sup>1</sup>, Wei Chen<sup>2</sup>, Xu Yu<sup>2,3</sup>, Wing Hei Marco Wong<sup>1</sup>, Ningning Sun<sup>4</sup>, Kun Zhang<sup>2</sup>,  
5 Weicong Cheng<sup>5</sup>, Jianping Gan<sup>5,6</sup>, Jian Zhen Yu<sup>1,2\*</sup>

6 1. Department of Chemistry, Hong Kong University of Science & Technology, Clear Water Bay,  
7 Kowloon, Hong Kong, 999077, China

8 2. Division of Environment and Sustainability, Hong Kong University of Science & Technology, Clear  
9 Water Bay, Kowloon, Hong Kong, 999077, China

10 3. Now at Jiangsu Collaborative Innovation Center of Atmospheric Environment and Equipment  
11 Technology, Jiangsu Key Laboratory of Atmospheric Environment Monitoring and Pollution Control,  
12 School of Environmental Science and Engineering, Nanjing University of Information Science and  
13 Technology, Nanjing, 210044, China

14 4. Key Lab of Geographic Information Science of the Ministry of Education, School of Geographic  
15 Sciences, East China Normal University, Shanghai, 210062, China

16 5. Department of Ocean Science, Hong Kong University of Science & Technology, Clear Water Bay,  
17 Kowloon, Hong Kong, 999077, China

18 6. Center for Ocean Research in Hong Kong and Macau, Hong Kong University of Science & Technology,  
19 Clear Water Bay, Kowloon, Hong Kong, 999077, China

20

21 \*Corresponding authors. Email: [jian.yu@ust.hk](mailto:jian.yu@ust.hk)

22

23 **Contents of this file**

24 Section S1

25 Tables S1-S4

26 Figures S1-S9

27

28

29 **Section S1. Calculation of PM<sub>2.5</sub> dry deposition velocity ( $V_d$ ) for marine and**  
30 **coastal urban environments**

31 To provide a transparent basis for the dry deposition velocities used in the main text,  
32 we estimated PM<sub>2.5</sub> particle dry deposition velocity using the size-segregated particle  
33 dry-deposition framework of Zhang et al. (2001). The calculation was performed  
34 separately for marine and coastal urban environments. To avoid introducing additional  
35 uncertainty from an assumed particle size distribution, a single representative PM<sub>2.5</sub> dry  
36 particle diameter of 0.5  $\mu\text{m}$  and particle density of 1500  $\text{kg m}^{-3}$  were used for both  
37 environments. The marine and urban surface roughness lengths were set to  $2.0 \times 10^{-4}$   
38 m and 1.0 m, respectively. Neutral atmospheric stability was assumed.

39

40 **Governing equations**

41 Following Zhang et al. (2001), the particle dry deposition velocity is calculated as

42 
$$V_d = V_g + \frac{1}{R_a + R_s}$$

43 where  $V_d$  is the dry deposition velocity,  $V_g$  is the gravitational settling velocity,  $R_a$  is  
44 the aerodynamic resistance, and  $R_s$  is the surface resistance.

45

46 *(1) The gravitational settling velocity ( $V_g$ )* is calculated as

47 
$$V_g = \frac{\rho_p d_p^2 g C_c}{18\mu}$$

48 where  $\rho_p$  is particle density,  $d_p$  is particle diameter,  $g$  is gravitational acceleration,  $\mu$   
49 is the dynamic viscosity of air, and  $C_c$  is the Cunningham slip correction factor:

50 
$$C_c = 1 + \frac{2\lambda}{d_p} [1.257 + 0.4\exp(-0.55d_p/\lambda)]$$

51 where  $\lambda$  is the mean free path of air molecules.

52

53 *(2) The aerodynamic resistance ( $R_a$ )* is calculated as

54 
$$R_a = \frac{\ln(z_R/z_0) - \psi_H}{\kappa u^*}$$

55 Here,  $z_R$  is the reference height,  $z_0$  is the surface roughness length,  $\psi_H$  is the stability  
56 correction,  $\kappa$  is the von Karman constant, and  $u^*$  is the friction velocity. Assuming  
57 neutral stability,  $\psi_H = 0$ , and  $u^*$  is estimated from the neutral logarithmic wind profile:

58 
$$u^* = \frac{\kappa U}{\ln(z_R/z_0)}$$

59

60 *(3) The surface resistance ( $R_s$ )* is calculated as

61 
$$R_s = \frac{1}{\varepsilon_0 u^* (E_B + E_{IM} + E_{IN}) R_1},$$

62 where  $\varepsilon_0 = 3$ , and  $E_B$ ,  $E_{IM}$ , and  $E_{IN}$  are the collection efficiencies by Brownian  
63 diffusion, impaction, and interception, respectively.  $R_1$  is the rebound correction factor.

64 Brownian diffusion is calculated as

65 
$$E_B = Sc^{-c}$$

66 where  $c$  is the land-use-dependent exponent, and  $Sc$  is the Schmidt number:

67 
$$Sc = \frac{\nu}{D}$$

68 
$$D = \frac{k_B T C_c}{3\pi\mu d_p}$$

69 where  $\nu$  is the kinematic viscosity of air,  $D$  is the Brownian diffusivity,  $k_B$  is the  
70 Boltzmann constant, and  $T$  is air temperature.

71 The impaction efficiency is calculated as

72 
$$E_{IM} = \left( \frac{St}{a + St} \right)^2$$

73 where  $St$  is the Stokes number and  $a$  is the land-use-dependent empirical coefficient.  
74 For the marine surface, the smooth-surface form is used:

75 
$$St = \frac{V_g u^{*2}}{g\nu}$$

76 For the urban surface, the collector-radius form is used:

77 
$$St = \frac{V_g u^*}{gA}$$

78 where  $A$  is the characteristic collector radius.

79 For the urban surface, the interception efficiency is

80 
$$E_{IN} = \frac{1}{2} \left( \frac{d_p}{A} \right)^2$$

81 For the marine surface,  $A$  is not defined for the ocean land-use category, and therefore  
82  $E_{IN}$  was set to zero. The rebound correction factor is

83 
$$R_1 = \exp(-St^{1/2})$$

84 The hygroscopic growth equation in Zhang et al. (2001) was not applied in this base  
85 calculation because a representative dry particle diameter of 0.5  $\mu\text{m}$  was prescribed.  
86 Therefore, the calculated  $V_d$  values should be interpreted as dry-particle estimates.

87

88 **Input parameters**

89 Table S1 summarizes the input parameters used in the calculation. Land-use-dependent  
 90 parameters were taken from Zhang et al. (2001), with LUC 14 used for the ocean  
 91 surface and LUC 15 used for the urban surface.

92

93 **Table S1.** Input parameters used for the Zhang et al. (2001)-based PM<sub>2.5</sub> dry deposition velocity  
 94 calculation.

| Parameter      | Marine                                                     | Coastal urban                                              | Reference or source                      |
|----------------|------------------------------------------------------------|------------------------------------------------------------|------------------------------------------|
| U              | 5.6 m s <sup>-1</sup>                                      | 2.6 m s <sup>-1</sup>                                      | Mean wind speed                          |
| d <sub>p</sub> | 0.5 μm                                                     | 0.5 μm                                                     | Zhang et al. (2001)                      |
| ρ <sub>p</sub> | 1500 kg m <sup>-3</sup>                                    | 1500 kg m <sup>-3</sup>                                    | Qi et al. (2020)                         |
| Z <sub>R</sub> | 10 m                                                       | 10 m                                                       | Approximate 10 m<br>wind reference       |
| Z <sub>0</sub> | 2 × 10 <sup>-4</sup> m                                     | 1.0 m                                                      | Qi et al. (2020);<br>Zhang et al. (2001) |
| ψ <sub>H</sub> | 0                                                          | 0                                                          | Neutral stability                        |
| κ              | 0.4                                                        | 0.4                                                        | Constant                                 |
| k <sub>B</sub> | 1.38 × 10 <sup>-23</sup> J K <sup>-1</sup>                 | 1.38 × 10 <sup>-23</sup> J K <sup>-1</sup>                 | Constant                                 |
| ε <sub>0</sub> | 3                                                          | 3                                                          | Zhang et al. (2001)                      |
| c              | 0.5                                                        | 0.56                                                       | Zhang et al. (2001)                      |
| a              | 100                                                        | 1.5                                                        | Zhang et al. (2001)                      |
| A              | not applicable                                             | 0.01 m                                                     | Zhang et al. (2001)                      |
| T              | 298.15 K                                                   | 298.15 K                                                   | Representative<br>summer value           |
| P              | 101325 Pa                                                  | 101325 Pa                                                  | Near sea-level<br>pressure               |
| μ              | 1.81 × 10 <sup>-5</sup> kg m <sup>-1</sup> s <sup>-1</sup> | 1.81 × 10 <sup>-5</sup> kg m <sup>-1</sup> s <sup>-1</sup> | Standard near-surface<br>value           |
| λ              | 6.65 × 10 <sup>-8</sup> m                                  | 6.65 × 10 <sup>-8</sup> m                                  | Standard near-surface<br>value           |

95

96 From the prescribed particle diameter and atmospheric constants, the shared particle-  
 97 related quantities are:

98  $C_c = 1.336$ ,

99  $V_g = 1.508 \times 10^{-5} \text{ m s}^{-1} = 0.00151 \text{ cm s}^{-1}$ ,

100  $D = 6.448 \times 10^{-11} \text{ m}^2 \text{ s}^{-1}$ ,

101  $Sc = 2.371 \times 10^5$ .

102

103 **Calculation results**

104 Table S2 summarizes the intermediate variables and final dry deposition velocities for  
 105 the marine and coastal urban base cases.

106 **Table S2.** Calculated intermediate variables and PM<sub>2.5</sub> dry  $V_d$  for the marine and coastal urban  
 107 base cases.

| Variable | Marine                | Coastal urban         | Unit               |
|----------|-----------------------|-----------------------|--------------------|
| $u^*$    | 0.207                 | 0.452                 | $\text{m s}^{-1}$  |
| $R_a$    | 130.7                 | 12.7                  | $\text{s m}^{-1}$  |
| $E_B$    | $2.05 \times 10^{-3}$ | $9.77 \times 10^{-4}$ | –                  |
| $St$     | $4.31 \times 10^{-3}$ | $6.95 \times 10^{-5}$ | –                  |
| $E_{IM}$ | $1.86 \times 10^{-9}$ | $2.14 \times 10^{-9}$ | –                  |
| $E_{IN}$ | 0                     | $1.25 \times 10^{-9}$ | –                  |
| $R_l$    | 0.936                 | 0.992                 | –                  |
| $R_s$    | 837.2                 | 761.5                 | $\text{s m}^{-1}$  |
| $V_d$    | 0.11                  | 0.13                  | $\text{cm s}^{-1}$ |

108

109 Using the Zhang et al. (2001) scheme with a single representative 0.5  $\mu\text{m}$  dry particle,  
 110 the estimated PM<sub>2.5</sub> dry deposition velocity was 0.11  $\text{cm s}^{-1}$  for the marine environment  
 111 and 0.13  $\text{cm s}^{-1}$  for the coastal urban environment. The urban value is slightly higher  
 112 than the marine value in this base calculation, despite the lower urban wind speed,  
 113 because the much larger urban roughness length results in a higher friction velocity and  
 114 lower aerodynamic resistance. This behavior is consistent with the Zhang et al. (2001)  
 115 framework, in which fine-particle deposition depends strongly on friction velocity and  
 116 surface roughness.

117 These values should be interpreted as first-order dry-particle estimates for a  
 118 representative 0.5  $\mu\text{m}$  particle. They do not include size-distribution averaging or  
 119 hygroscopic growth. Because real PM<sub>2.5</sub>-bound nitrogen can be distributed across a  
 120 range of particle sizes and may undergo hygroscopic growth under humid marine  
 121 conditions, the effective bulk PM<sub>2.5</sub> deposition velocity may differ from the single-size  
 122 estimates reported here.

123

**Table S3.** Summary of sampling times, sailing distances, high-NO<sub>x</sub> ship-emission notes (exclude from marine samples), and notes on ship stops for the 91 cruise samples.

| Sample ID | Date         | Start Time | End Time | Duration (h) | Sailing distance (km) | Ship emission influence | Ship stops |
|-----------|--------------|------------|----------|--------------|-----------------------|-------------------------|------------|
| AoE01     | 2024/7/12    | 10:52:00   | 12:46:35 | 1.91         | 27.6                  |                         |            |
| AoE02     | 2024/7/12    | 15:48:50   | 20:48:45 | 2.48         | 27.7                  |                         |            |
| AoE03     | 2024/7/12-13 | 21:22:50   | 7:45:10  | 2.08         | 22.3                  |                         |            |
| AoE04     | 2024/7/13    | 8:57:40    | 12:21:30 | 2.14         | 22.0                  |                         |            |
| AoE05     | 2024/7/13    | 13:17:20   | 18:26:55 | 2.18         | 21.3                  |                         |            |
| AoE06     | 2024/7/13-14 | 20:15:10   | 0:02:40  | 1.88         | 18.7                  |                         |            |
| AoE07     | 2024/7/14    | 5:48:30    | 10:04:50 | 2.24         | 21.2                  |                         |            |
| AoE08     | 2024/7/14    | 13:12:40   | 15:46:40 | 2.57         | 27.4                  | ✓                       |            |
| AoE09     | 2024/7/14    | 15:53:05   | 18:18:05 | 2.42         | 28.3                  |                         |            |
| AoE10     | 2024/7/14    | 19:36:50   | 23:34:10 | 1.89         | 24.2                  |                         |            |
| AoE11     | 2024/7/15    | 5:30:10    | 7:39:50  | 2.16         | 27.6                  |                         |            |
| AoE12     | 2024/7/15    | 8:41:40    | 11:39:50 | 2.97         | 13.4                  | ✓                       |            |
| AoE13     | 2024/7/15    | 14:05:20   | 16:10:00 | 1.72         | 13.0                  |                         |            |
| AoE14     | 2024/7/15    | 19:11:25   | 21:25:50 | 2.24         | 17.5                  |                         |            |
| AoE15     | 2024/7/15-16 | 21:34:40   | 7:23:00  | 9.54         | 126.5                 | ✓                       |            |
| AoE16     | 2024/7/16    | 10:18:50   | 15:57:50 | 5.65         | 17.1                  |                         |            |
| AoE17     | 2024/7/16    | 16:30:05   | 19:25:00 | 2.50         | 28.8                  | ✓                       |            |
| AoE18     | 2024/7/16-17 | 19:44:45   | 0:21:10  | 3.49         | 30.0                  |                         |            |
| AoE19     | 2024/7/17    | 0:37:20    | 7:16:30  | 6.65         | 0.0                   |                         | ✓          |
| AoE20     | 2024/7/17    | 9:14:20    | 18:56:40 | 9.71         | 0.0                   |                         | ✓          |
| AoE21     | 2024/7/17-18 | 19:41:50   | 3:09:00  | 7.45         | 0.0                   |                         | ✓          |
| AoE22     | 2024/7/18    | 3:27:00    | 5:59:30  | 2.54         | 13.2                  | ✓                       |            |
| AoE23     | 2024/7/18    | 6:34:30    | 10:20:40 | 2.94         | 30.3                  |                         |            |
| AoE24     | 2024/7/18    | 10:51:40   | 14:22:45 | 2.58         | 24.3                  | ✓                       |            |
| AoE25     | 2024/7/18    | 14:46:00   | 17:20:40 | 2.28         | 18.3                  |                         |            |
| AoE26     | 2024/7/18    | 18:42:25   | 23:16:00 | 3.46         | 38.6                  |                         |            |
| AoE27     | 2024/7/18-19 | 23:36:30   | 5:06:50  | 4.30         | 40.6                  |                         |            |
| AoE28     | 2024/7/19    | 5:37:50    | 9:09:00  | 2.80         | 30.8                  |                         |            |
| AoE29     | 2024/7/19    | 9:30:50    | 12:48:10 | 2.61         | 29.4                  |                         |            |
| AoE30     | 2024/7/19    | 13:11:00   | 16:52:00 | 2.54         | 28.6                  |                         |            |
| AoE31     | 2024/7/19    | 18:10:20   | 20:58:40 | 2.81         | 0.0                   |                         | ✓          |
| AoE32     | 2024/7/19-20 | 21:12:10   | 1:43:20  | 3.11         | 47.0                  |                         |            |
| AoE33     | 2024/7/20    | 6:21:30    | 10:16:45 | 2.57         | 36.1                  |                         |            |
| AoE34     | 2024/7/20    | 10:37:10   | 15:07:00 | 2.48         | 29.5                  |                         |            |
| AoE35     | 2024/7/20    | 15:49:00   | 19:19:30 | 2.52         | 29.2                  |                         |            |
| AoE36     | 2024/7/20    | 20:15:00   | 22:53:00 | 2.09         | 18.7                  | ✓                       |            |
| AoE37     | 2024/7/20-21 | 23:07:40   | 3:48:40  | 3.84         | 35.6                  |                         |            |
| AoE38     | 2024/7/21    | 4:06:40    | 7:26:50  | 2.95         | 28.8                  |                         |            |
| AoE39     | 2024/7/21    | 7:48:30    | 11:12:30 | 2.77         | 33.9                  |                         |            |
| AoE40     | 2024/7/21    | 11:39:30   | 15:42:40 | 3.07         | 36.2                  |                         |            |
| AoE41     | 2024/7/21-22 | 22:04:20   | 4:01:00  | 5.94         | 0.0                   |                         | ✓          |
| AoE42     | 2024/7/22    | 4:21:30    | 8:20:00  | 3.02         | 26.2                  |                         |            |
| AoE43     | 2024/7/22    | 8:49:50    | 12:19:20 | 2.53         | 31.3                  | ✓                       |            |
| AoE44     | 2024/7/22    | 13:04:20   | 16:40:20 | 2.44         | 32.5                  |                         |            |
| AoE45     | 2024/7/22    | 17:31:10   | 21:29:20 | 2.43         | 30.4                  |                         |            |
| AoE46     | 2024/7/22-23 | 22:00:50   | 4:56:40  | 6.93         | 185.2                 |                         |            |
| AoE47     | 2024/7/23    | 5:11:00    | 9:24:30  | 4.23         | 0.0                   |                         | ✓          |
| AoE48     | 2024/7/23    | 9:32:10    | 16:43:40 | 7.19         | 0.0                   |                         | ✓          |
| AoE49     | 2024/7/23-24 | 16:50:10   | 0:22:30  | 7.54         | 0.0                   |                         | ✓          |
| AoE50     | 2024/7/24    | 0:28:30    | 7:49:10  | 7.34         | 0.0                   |                         | ✓          |
| AoE51     | 2024/7/24    | 8:10:10    | 14:11:30 | 6.02         | 0.0                   |                         | ✓          |
| AoE52     | 2024/7/24-25 | 17:39:10   | 1:04:30  | 7.42         | 0.0                   |                         | ✓          |
| AoE53     | 2024/7/25    | 1:10:20    | 8:28:50  | 7.31         | 0.0                   |                         | ✓          |
| AoE54     | 2024/7/25    | 8:36:50    | 10:22:50 | 1.77         | 0.0                   |                         | ✓          |
| AoE55     | 2024/7/25    | 10:27:00   | 14:55:10 | 4.47         | 49.8                  |                         |            |
| AoE56     | 2024/7/25    | 15:02:50   | 19:46:20 | 4.73         | 0.0                   |                         | ✓          |
| AoE57     | 2024/7/25-26 | 19:54:20   | 12:58:40 | 17.07        | 0.0                   |                         | ✓          |
| AoE58     | 2024/7/26    | 13:30:00   | 16:38:40 | 3.14         | 0.0                   | ✓                       |            |
| AoE59     | 2024/7/26    | 16:45:40   | 23:19:00 | 6.56         | 0.0                   |                         | ✓          |
| AoE60     | 2024/7/26-27 | 23:25:30   | 11:43:10 | 12.29        | 0.0                   |                         | ✓          |
| AoE61     | 2024/7/27    | 12:32:00   | 16:01:20 | 3.38         | 131.0                 |                         |            |
| AoE62     | 2024/7/27-28 | 17:00:40   | 5:06:00  | 12.09        | 0.0                   |                         | ✓          |
| AoE63     | 2024/7/28    | 7:07:00    | 9:47:40  | 2.03         | 22.9                  |                         |            |
| AoE64     | 2024/7/28    | 10:31:10   | 14:31:00 | 2.88         | 36.9                  | ✓                       |            |
| AoE65     | 2024/7/28    | 15:05:40   | 17:12:50 | 2.12         | 27.0                  |                         |            |
| AoE66     | 2024/7/28    | 18:23:50   | 21:52:10 | 2.14         | 28.2                  | ✓                       |            |
| AoE67     | 2024/7/28-29 | 22:20:00   | 0:26:00  | 1.58         | 22.9                  | ✓                       |            |
| AoE68     | 2024/7/29    | 6:05:40    | 8:40:10  | 2.03         | 26.6                  |                         |            |
| AoE69     | 2024/7/29    | 9:18:40    | 11:57:35 | 2.08         | 20.7                  |                         |            |
| AoE70     | 2024/7/29    | 12:39:00   | 17:22:40 | 2.84         | 29.8                  |                         |            |
| AoE71     | 2024/7/29    | 18:20:20   | 22:49:30 | 3.18         | 40.6                  |                         |            |
| AoE72     | 2024/7/30    | 5:43:10    | 9:57:40  | 2.44         | 32.8                  |                         |            |
| AoE73     | 2024/7/30    | 10:46:30   | 14:24:00 | 2.41         | 29.6                  |                         |            |
| AoE74     | 2024/7/30    | 15:03:00   | 18:48:00 | 2.24         | 28.6                  |                         |            |
| AoE75     | 2024/7/30    | 19:09:45   | 23:37:10 | 2.68         | 33.5                  |                         |            |
| AoE76     | 2024/7/31    | 9:45:10    | 13:00:00 | 2.22         | 26.4                  |                         |            |
| AoE77     | 2024/7/31    | 13:20:10   | 17:19:00 | 2.31         | 32.3                  | ✓                       |            |
| AoE78     | 2024/7/31    | 17:51:00   | 19:47:30 | 1.86         | 23.9                  | ✓                       |            |
| AoE79     | 2024/7/31    | 20:29:30   | 22:34:45 | 1.46         | 18.2                  | ✓                       |            |
| AoE80     | 2024/8/1     | 6:36:20    | 10:22:30 | 2.58         | 29.0                  |                         |            |
| AoE81     | 2024/8/1     | 10:52:50   | 14:36:20 | 1.92         | 23.5                  | ✓                       |            |
| AoE82     | 2024/8/1     | 15:16:50   | 18:50:20 | 2.53         | 37.0                  |                         |            |
| AoE83     | 2024/8/1     | 19:20:50   | 22:38:50 | 2.33         | 32.5                  |                         |            |
| AoE84     | 2024/8/1-2   | 22:58:00   | 0:08:00  | 1.17         | 17.5                  |                         |            |
| AoE85     | 2024/8/2     | 5:52:00    | 8:44:50  | 1.88         | 26.3                  |                         |            |
| AoE86     | 2024/8/2     | 9:06:20    | 11:52:40 | 2.17         | 29.4                  |                         |            |
| AoE87     | 2024/8/2     | 12:11:30   | 14:20:10 | 1.86         | 19.9                  |                         |            |
| AoE88     | 2024/8/2     | 14:42:40   | 19:36:30 | 4.90         | 63.4                  |                         |            |
| AoE89     | 2024/8/2     | 20:04:00   | 21:39:00 | 1.58         | 20.5                  |                         |            |
| AoE90     | 2024/8/2     | 22:01:20   | 23:59:50 | 1.98         | 27.9                  |                         |            |
| AoE91     | 2024/8/3     | 6:14:00    | 10:01:40 | 3.02         | 38.4                  |                         |            |

126 **Table S4.** Statistical comparison of water-soluble PM<sub>2.5</sub> composition and nitrogen speciation  
 127 among marine, urban, and ship-emission-influenced samples, using Mann–Whitney–Wilcoxon  
 128 tests, based on offline AMS measurements. The values in the table represent the one-sided  
 129 Mann–Whitney–Wilcoxon p values.

| Metric                                        | Urban vs. Marine                | Ship vs. Marine | Ship vs. Urban | Interpretation                |
|-----------------------------------------------|---------------------------------|-----------------|----------------|-------------------------------|
| Organics                                      | 0.65                            | 0.78            | 0.97           | N.S.                          |
| NO <sub>3</sub> <sup>-</sup>                  | <b>4.8 × 10<sup>-5</sup>***</b> | 0.81            | 0.13           | Urban > Marine                |
| SO <sub>4</sub> <sup>2-</sup>                 | 0.63                            | 0.87            | 0.43           | N.S.                          |
| NH <sub>4</sub> <sup>+</sup>                  | <b>0.016*</b>                   | 0.57            | 0.39           | Marine > Urban                |
| Cl <sup>-</sup>                               | 0.26                            | 0.73            | 0.64           | N.S.                          |
| CHN <sub>1</sub>                              | <b>0.030*</b>                   | <b>0.012*</b>   | 0.13           | Urban > Marine, Ship > Marine |
| CHN <sub>&gt;1</sub>                          | <b>0.002**</b>                  | 0.25            | 0.92           | Urban > Marine                |
| CHON <sub>1</sub>                             | <b>0.028*</b>                   | <b>0.047*</b>   | 0.216          | Urban > Marine, Ship > Marine |
| CHON <sub>&gt;1</sub>                         | 0.85                            | <b>0.039*</b>   | <b>0.041*</b>  | Ship > Urban, Ship > Marine   |
| Amines                                        | 0.052                           | 0.09            | <b>0.008*</b>  | Ship > Urban                  |
| Amides                                        | <b>0.047*</b>                   | 0.523           | <b>0.022*</b>  | Marine > Urban, Ship > Urban  |
| Amino acids                                   | 0.22                            | 0.675           | 0.818          | N.S.                          |
| Imidazole-like heterocycles                   | 0.19                            | <b>0.0026*</b>  | <b>0.0001*</b> | Ship > Marine, Ship > Marine  |
| NO <sup>+</sup> /NO <sub>2</sub> <sup>+</sup> | <b>0.001**</b>                  | <b>0.0081**</b> | 0.97           | Urban > Marine, Ship > Marine |
| C <sub>≥3</sub> / ON                          | <b>9.4 × 10<sup>-8</sup>***</b> | <b>0.0353*</b>  | 0.11           | Urban > Marine, Ship > Marine |

Note:

1. N.S. indicates no significant differences among the three sample types.
2. Statistical significance: \*\*\*p < 0.001, \*\*p < 0.01, \*p < 0.05.
3. All statistical comparisons are based on relative contributions rather than absolute concentrations. Specifically, Organics, NO<sub>3</sub><sup>-</sup>, SO<sub>4</sub><sup>2-</sup>, NH<sub>4</sub><sup>+</sup>, and Cl<sup>-</sup> represent their mass fractions relative to total water-soluble PM<sub>2.5</sub>; CHN<sub>1</sub>, CHN<sub>>1</sub>, CHON<sub>1</sub>, and CHON<sub>>1</sub> represent their relative contributions to total ON based on these four categories; and amines, amides, amino acids, and imidazole-like heterocycles represent their relative contributions to total reduced ON, based on the four categories.
4. C<sub>≥3</sub> / ON indicates the N-containing organic fragment signals with carbon number greater than 3 to the total N-containing organic fragment signals.

130  
 131  
 132  
 133  
 134  
 135  
 136  
 137  
 138  
 139  
 140

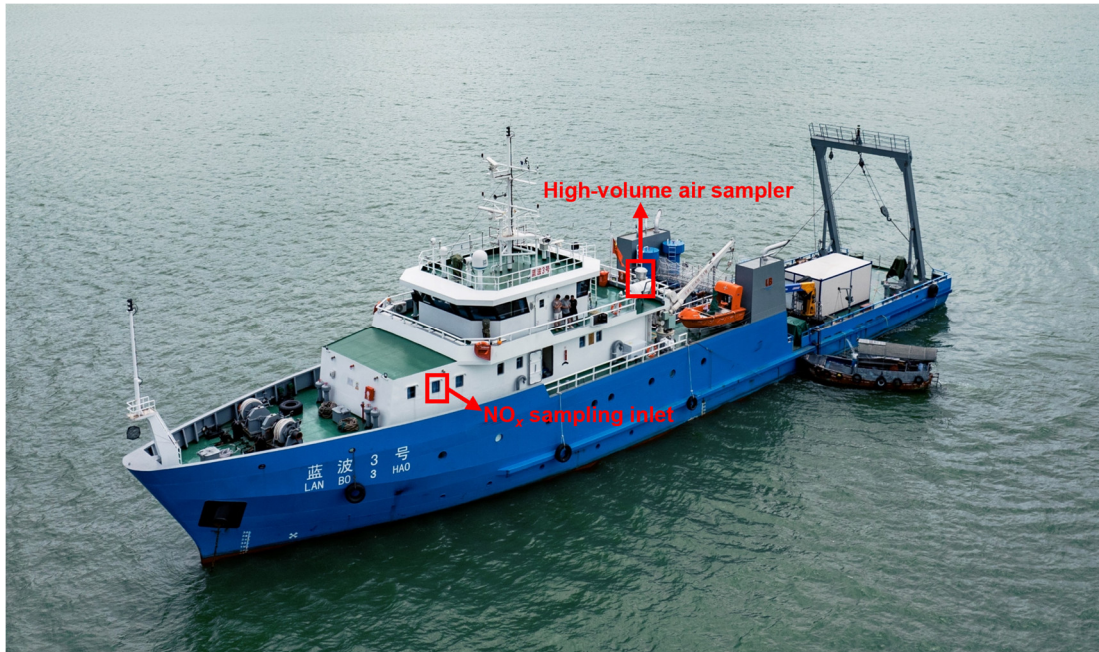

141

142 **Figure S1.** Photograph of the shipboard aerosol sampling configuration during the cruise  
 143 campaign. Red boxes and arrows indicate the location of the high-volume air sampler on the  
 144 upper deck outside the bridge and the nearby NO<sub>x</sub> sampling inlet on the lower deck, illustrating  
 145 their close proximity and the basis for using NO<sub>x</sub> as an operational screen for ship-exhaust  
 146 influence.

147

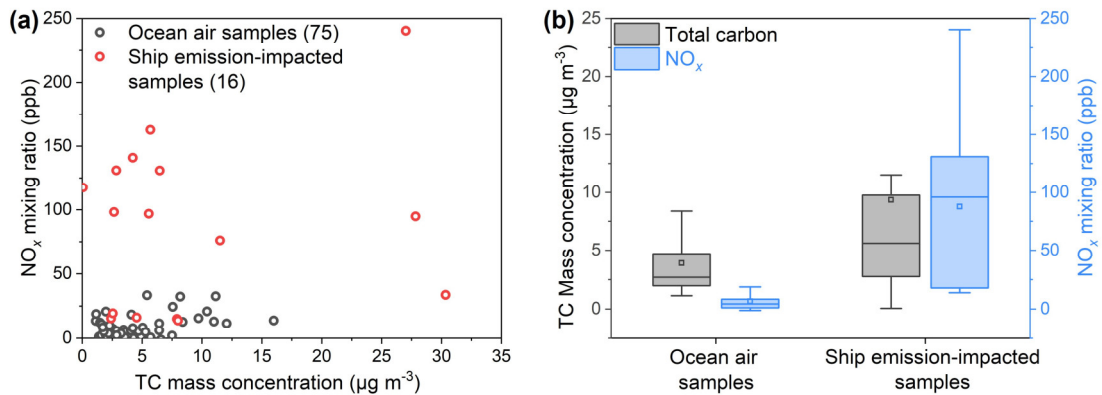

148

149 **Figure S2. (a)** Relationship between NO<sub>x</sub> mixing ratio (ppb) and TC mass concentrations  
 150 ( $\mu\text{g}/\text{m}^3$ ). Black symbols denote ocean-air samples ( $n = 75$ ) used in the subsequent analysis, and  
 151 red symbols denote ship-emission-impacted samples ( $n = 16$ ), which were excluded from  
 152 further analysis. **(b)** Box-and-whisker plots showing TC concentrations (gray boxes, left y-axis)  
 153 and NO<sub>x</sub> mixing ratios (blue boxes, right y-axis) for the ocean-air and ship-emission-impacted  
 154 sample groups.

155

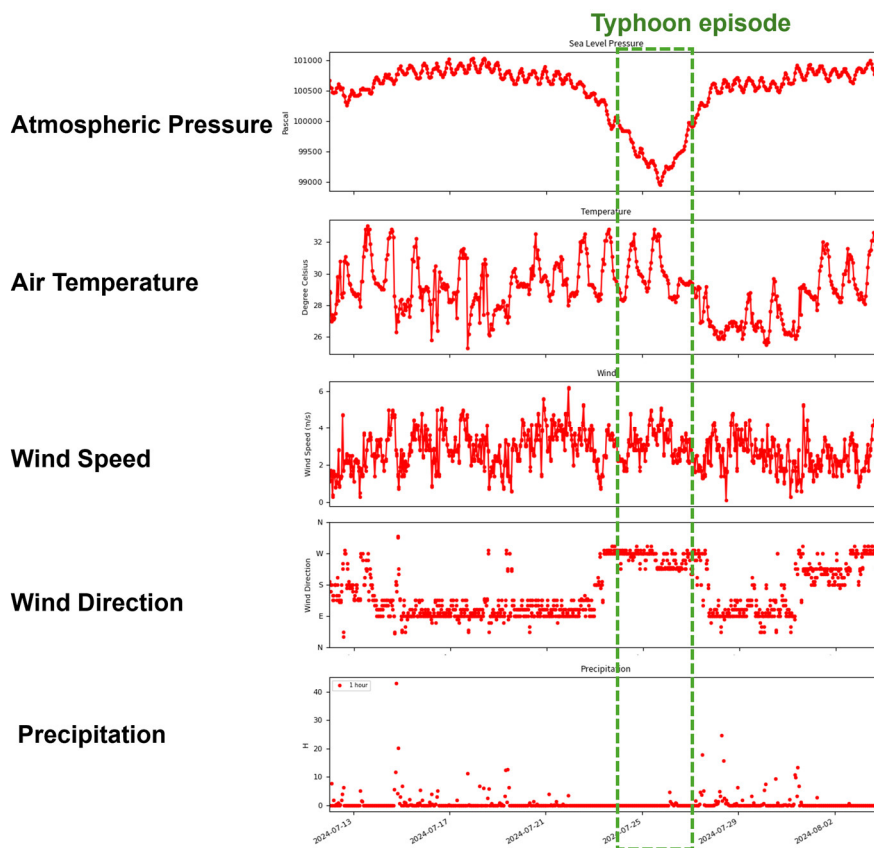

156

157 **Figure S3.** Time series of five key meteorological parameters, including atmospheric pressure,  
 158 wind speed, wind direction, air temperature, and precipitation, measured at the King's Park  
 159 station of the Hong Kong Observatory (HKO), located approximately 8 km southeast of the  
 160 Tsuen Wan (TW) sampling site. The King's Park HKO station represents the closest station to  
 161 the TW sampling site, with comprehensive observations of meteorological conditions. The  
 162 green dashed box marks the typhoon-influenced period.

163

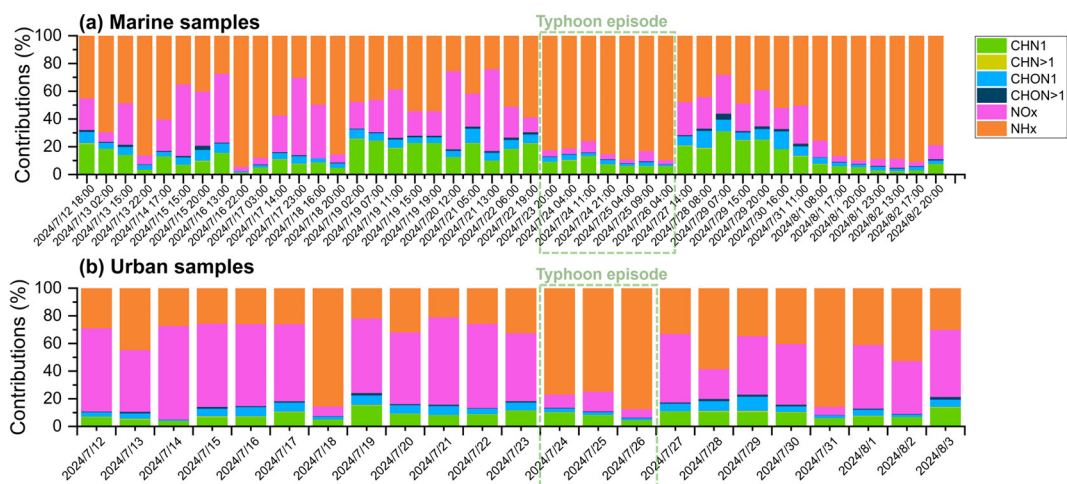

164

165 **Figure S4.** Time series of relative contributions of  $\text{NH}_x$ ,  $\text{NO}_x$ , and organic nitrogen subgroups  
 166 (CHN and CHON classes) in marine and urban  $\text{PM}_{2.5}$ , with the typhoon-influenced period  
 167 highlighted.

168

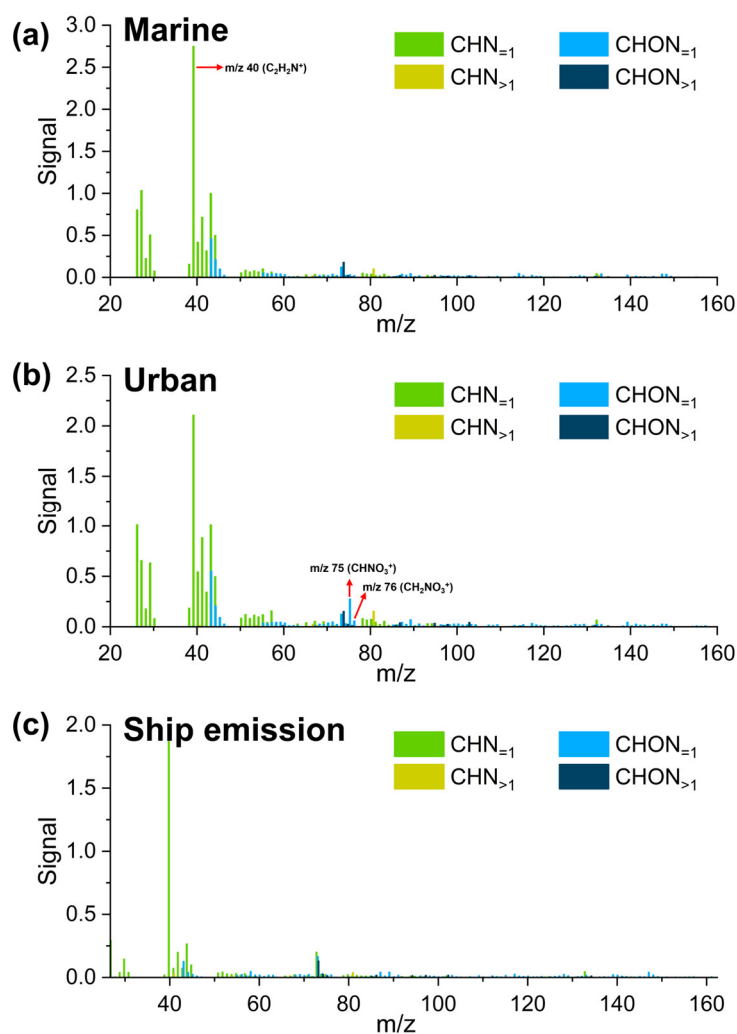

169

170 **Figure S5.** Average nitrogen-containing organic fragments mass spectra for (a) marine, (b)  
 171 urban, and (c) ship-emission-influenced samples

172

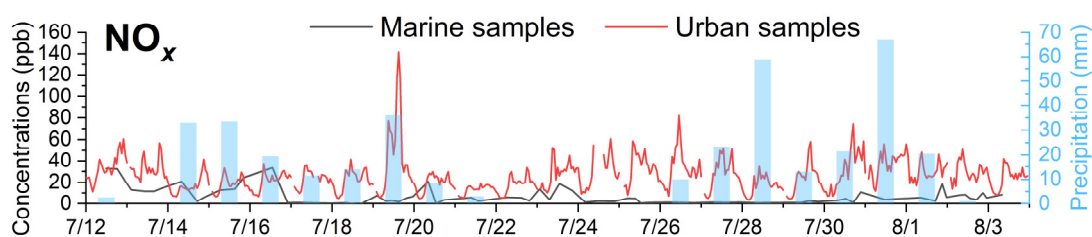

173

174 **Figure S6.** Time series of NO<sub>x</sub> concentrations for marine (black line) and urban (red line)  
 175 samples during the campaign. The urban NO<sub>x</sub> data are reported at an hourly resolution, whereas  
 176 the marine NO<sub>x</sub> values are averaged over ~2-hour intervals to match the corresponding filter  
 177 sampling periods for the marine aerosol samples.

178

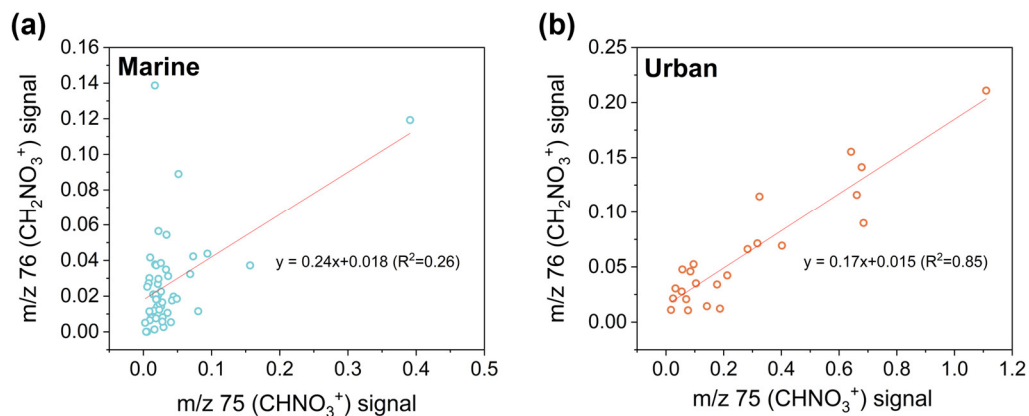

179

180 **Figure S7.** Relationship between  $\text{CHNO}_3^+$  ( $m/z$  75) and  $\text{CH}_2\text{NO}_3^+$  ( $m/z$  76) signals in (a) marine  
 181 and (b) urban samples

182

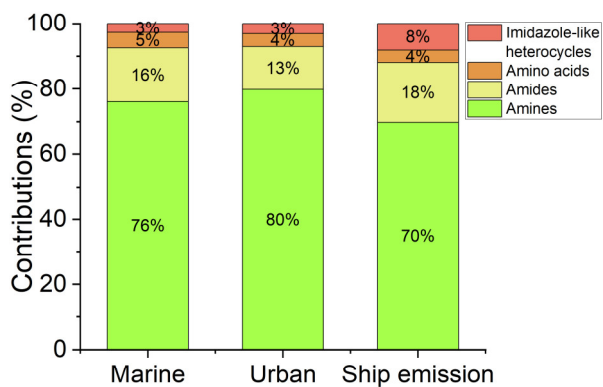

183

184 **Figure S8.** Comparative composition of reduced ON species in marine, urban, and ship-  
 185 emission-influenced  $\text{PM}_{2.5}$  samples.

186

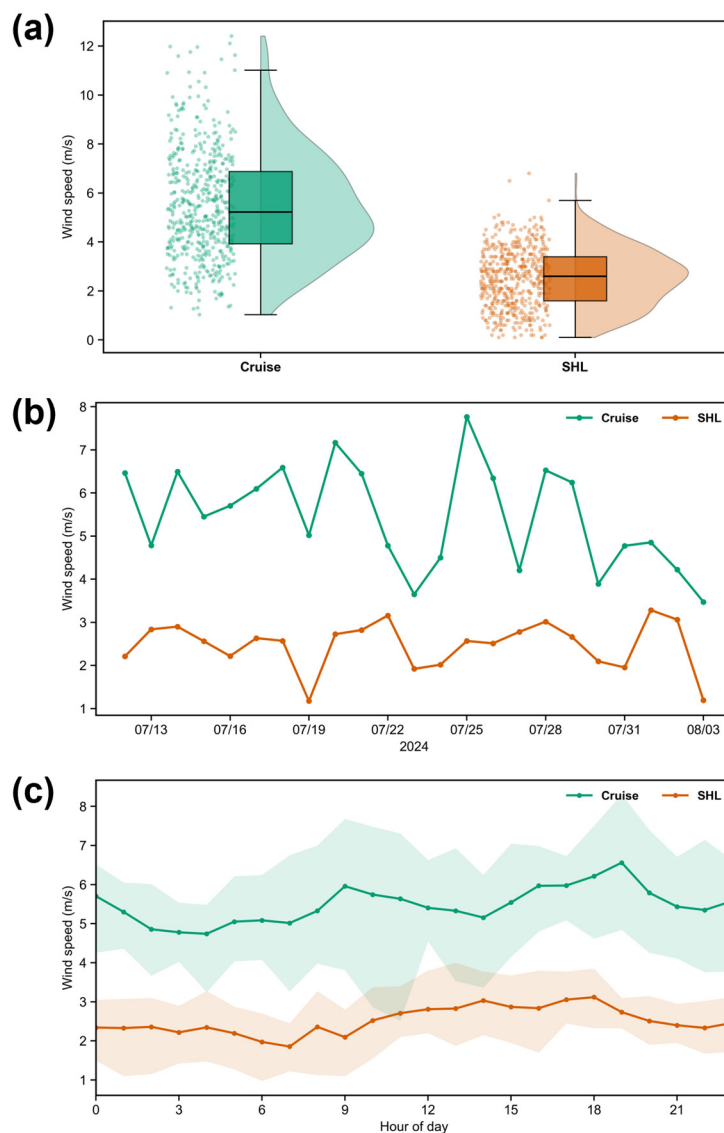

187

188 **Figure S9.** Wind speed comparison between the marine regions (cruise) and the coastal urban  
 189 site (SHL). **(a)** Box plots of the hourly wind speeds during the campaign period. **(b)** Daily mean  
 190 wind-speed variations during the campaign period. **(c)** Mean diurnal patterns of wind speed,  
 191 with shaded areas indicating variability.

192

193 **Reference**

194 Qi, J., Yu, Y., Yao, X., Gang, Y., & Gao, H. (2020). Dry deposition fluxes of inorganic  
 195 nitrogen and phosphorus in atmospheric aerosols over the Marginal Seas and  
 196 Northwest Pacific. *Atmospheric Research*, 245.  
 197 <https://doi.org/10.1016/j.atmosres.2020.105076>

198 Zhang, L., Gong, S., Padro, J., & Barrie, L. (2001). A size-segregated particle dry deposition  
 199 scheme for an atmospheric aerosol module. *Atmospheric Environment*, 35(3), 549-  
 200 560. [https://doi.org/10.1016/S1352-2310\(00\)00326-5](https://doi.org/10.1016/S1352-2310(00)00326-5)

201
